# Supplementary material for: The Impact of Yangtze River Discharge, Ocean Currents and Historical Events on the Biogeographic Pattern of Cellana toreuma along the China Coast
Source: PubMed Central journal article supplement (PMC3338569; doi:10.1371/journal.pone.0036178), 2012-04-26
Supplement: pone.0036178.s002.pdf [file pone.0036178.s002.pdf]

NJ

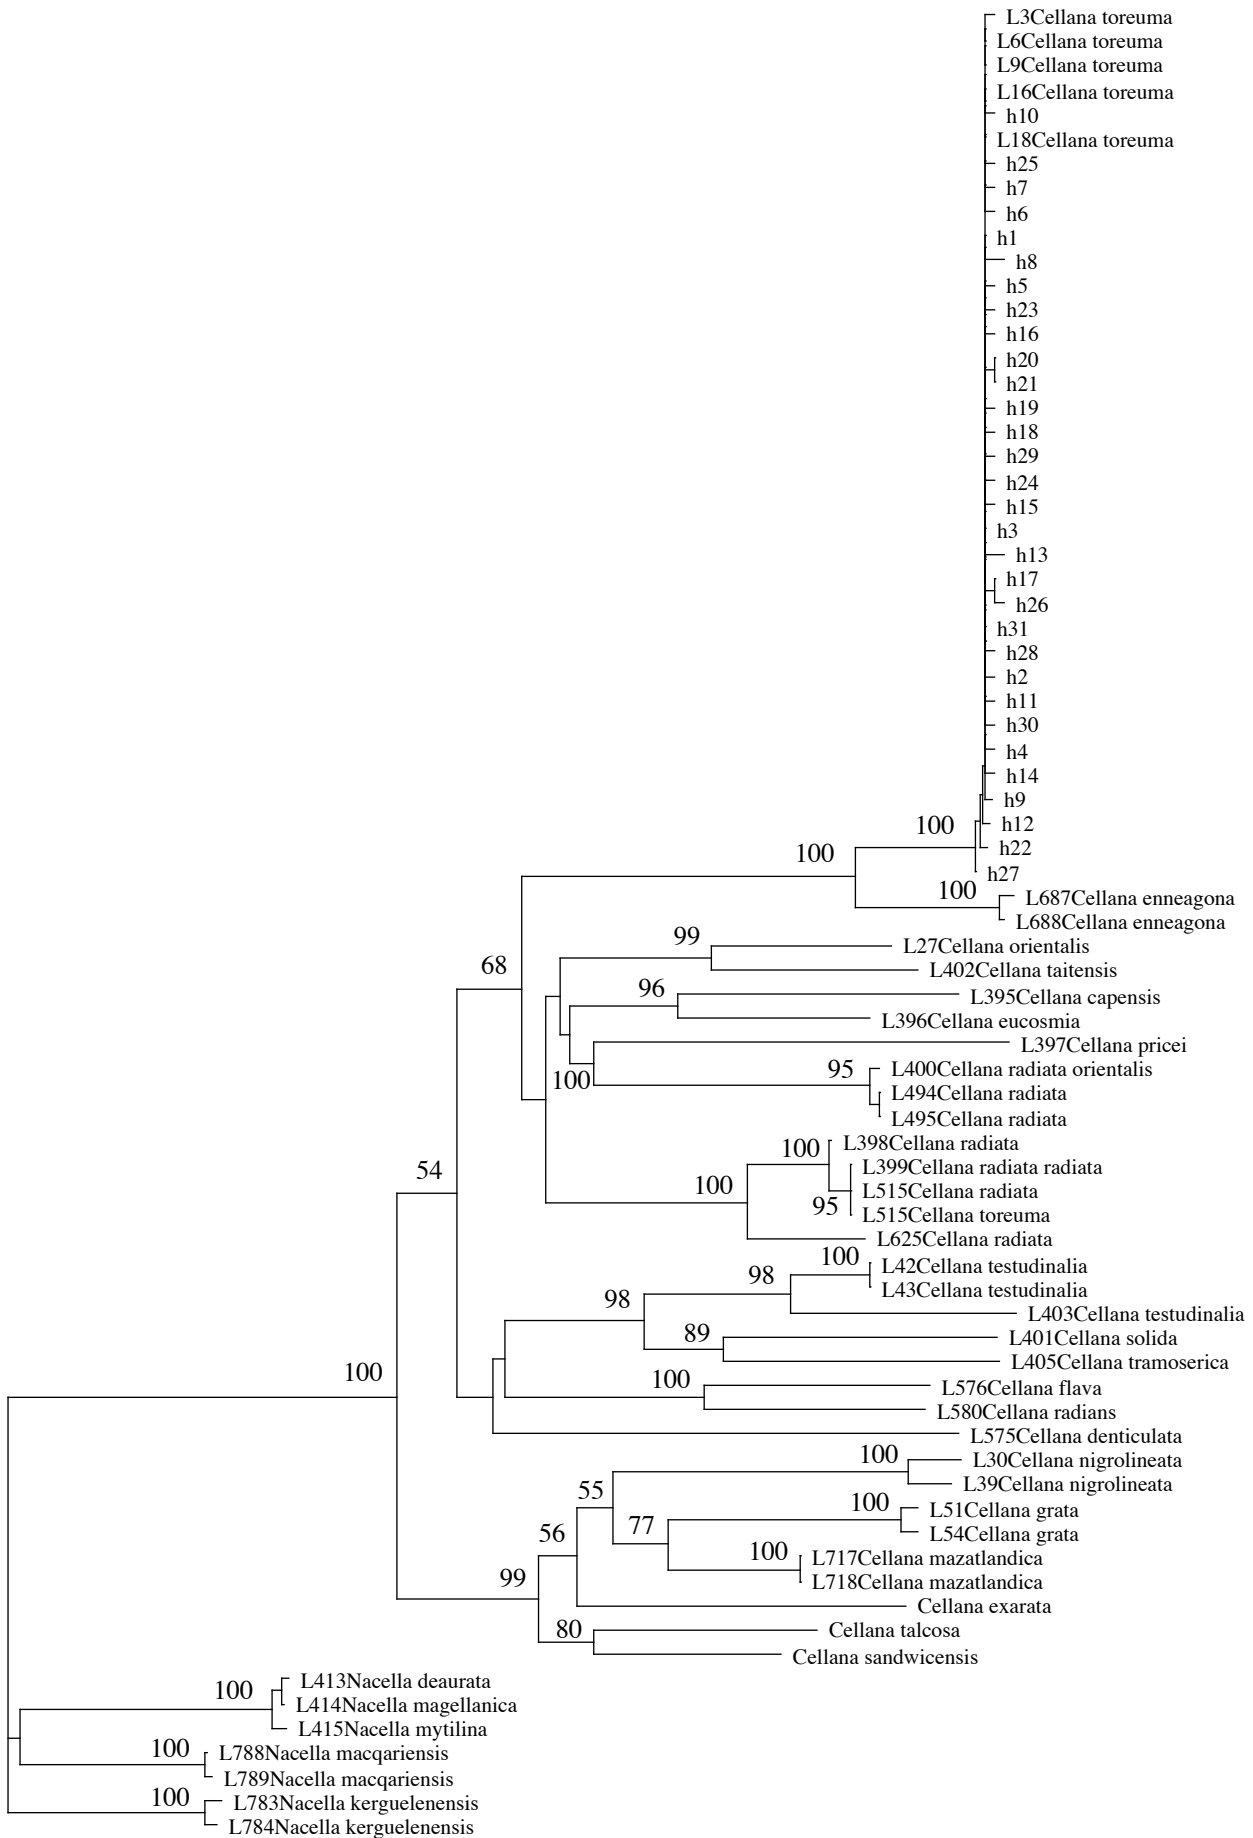

— 0.01 substitutions/site
